1           **First detection of *Leptospira santarosai* in the reproductive track of a boar: a**  
2                           **potential threat to swine production and public health**

3  
4 Eduardo A. Diaz<sup>1</sup> ¶, Ligia Luna<sup>2</sup> ¶, Ana Burgos-Mayorga<sup>3</sup>, Gustavo Donoso<sup>1</sup>, Diego A.  
5 Guzman<sup>2</sup>, María Ines Baquero<sup>5</sup>, Talima Pearson<sup>6</sup>, Veronica Barragan<sup>2\*</sup>

6  
7 <sup>1</sup> Hospital de Fauna Silvestre TUERI, Escuela de Medicina Veterinaria, Universidad San  
8 Francisco de Quito USFQ, Quito, Ecuador

9 <sup>2</sup> Instituto de Microbiología, Colegio de Ciencias Biológicas y Ambientales, Universidad  
10 San Francisco de Quito USFQ, Quito, Ecuador

11 <sup>3</sup> Facultad de Ciencias Pecuarias, Medicina Veterinaria, Escuela Superior Politécnica de  
12 Chimborazo (ESPOCH), Riobamba, Ecuador

13 <sup>4</sup> Instituto de Biodiversidad Tropical, Laboratorio de Salud Animal, Universidad San  
14 Francisco de Quito USFQ, Quito, Ecuador

15 <sup>5</sup> Facultad de Medicina Veterinaria y Zootecnia, Universidad Central del Ecuador, Quito,  
16 Ecuador

17 <sup>6</sup> Pathogen and Microbiome Institute, Northern Arizona University, Flagstaff, Arizona,  
18 United States of America.

19  
20  
21  
22 \* Corresponding author

23 E-mail: [vbarragan@usfq.edu.ec](mailto:vbarragan@usfq.edu.ec) (VB)

24  
25 ¶ Eduardo Diaz and Ligia Luna contributed equally to this work

## 26 **Abstract**

### 27 **Background**

28 Leptospirosis causes significant economic losses and is an occupational risk in the swine industry,  
29 especially in developing tropical regions where social and geoclimatic conditions are favorable  
30 for the transmission of this disease. Although vaccination can reduce infection risk, efficacy is  
31 diminished if local genetic and antigenic variants of the pathogen are not accounted for in the  
32 vaccine. Identifying and characterizing strains that circulate in different populations is therefore  
33 critical for public health mitigation practices.

### 34 **Methodology/Principal findings**

35 Our study was conducted on a rural breeding farm in Ecuador, where we identified, for the first  
36 time, *Leptospira santarosai* in the kidneys, testicles, and ejaculate of a vaccinated boar. *L.*  
37 *santarosai* was detected with a PCR assay that targets *lipL32*, and identified by target MLST gene  
38 sequencing using an Oxford Nanopore MinION sequencer.

### 39 **Conclusions/Significance**

40 As *L. santarosai* is pathogenic in other livestock species and humans, our finding highlights the  
41 need to evaluate the prevalence and epidemiological significance of this pathogen in pigs. In  
42 addition, further studies are needed to identify and characterize local serovars that may impact  
43 diagnosis and vaccination programs to better control leptospirosis in pigs and spillover into the  
44 human population.

45

## 46 **Author summary**

47 **Leptospirosis poses a significant threat to human and animal health. In tropical**  
48 **countries, leptospirosis is very common, and responsible of economic losses in the**  
49 **livestock industry. In peridomestic and rural farms, the spillover of leptospira to**  
50 **humans is particularly likely as humans live and work in close proximity to animals.**  
51 **Although animal vaccination can reduce risk of infection, efficacy is diminished**  
52 **when local variants are not included in the vaccine. This report describes, for the**  
53 **first time, the presence of *Leptospira santarosai* in the reproductive tract of a**

54 **vaccinated domestic boar from a rural farm in Ecuador. We detected the pathogen**  
55 **in its semen and urine, and despite no tissue damage, was observed in the kidneys,**  
56 **testes or epididymis. The farm veterinarian reported reproductive problems in sows**  
57 **inseminated with the semen from this boar. Our results highlight the importance of**  
58 **recognizing locally circulating serovars and species so that they can be included in**  
59 **vaccines to prevent infection and disease. Effective control of leptospirosis in**  
60 **livestock not only reduces economic losses for breeders, but also reduces the risk of**  
61 **infection and disease in humans.**

62

## 63 **Introduction**

64 Leptospirosis is a reemerging zoonosis with worldwide distribution and a significant  
65 impact on livestock production. The disease is frequently associated with reproductive  
66 disorders, including embryonic resorption, fetal mummification, stillbirths, or neonatal  
67 mortality causing significant economic losses. Furthermore, leptospirosis in farmers,  
68 slaughterhouse workers, and veterinarians is very common and occurs through direct  
69 contact with urine or tissues from infected animals, or indirectly through contaminated  
70 soil and water [1]. Unfortunately, knowledge about the disease in livestock is biased  
71 towards intensive breeding industries in developed regions of the world, while the  
72 epidemiological characteristics of leptospirosis in developing nations remain unclear [2].

73 In most low-income tropical countries, leptospirosis is endemic and common.  
74 Ownership of a small number of peridomestic livestock is common in poor rural areas,  
75 and pigs are often part of this community. In these situations, pigs are often raised under  
76 poor sanitary conditions without veterinary guidance [3,4]. Importantly, the social and  
77 geoclimatic characteristics of these areas are conducive to the transmission and  
78 maintenance of *Leptospira*. Indeed, in endemic regions, leptospira can persist in the  
79 urogenital tract of asymptomatic animals that excrete the bacteria in urine and genital  
80 fluids, providing a source of infection for susceptible hosts [5]. In these settings, spillover

81 to humans is likely as humans and animals live in close proximity [2]. Although  
82 vaccination can reduce leptospira transmission, efficacy is commonly reduced due to low  
83 immunity against strains that are not represented in vaccines [6]. This is especially  
84 problematic in countries where very little information on circulating serovars is available  
85 and when local isolates are not available for inclusion in MAT tests for disease diagnosis.  
86 Given the high, uncharacterized diversity of pathogenic *Leptospira* in tropical developing  
87 countries, understanding the local epidemiology of leptospirosis is paramount for disease  
88 mitigation.

89         Recent studies in rural communities on the coast of Ecuador show that exposure  
90 to livestock is common and pigs may serve as an under-recognized source of high  
91 *Leptospira* diversity in the region [7–9]. Swine leptospirosis has historically been linked  
92 to exposure to urine from carrier animals, but there have been no links to the reproductive  
93 system in disease transmission [7,8,10,11].

94         Here, we present the case of a domestic boar raised in a rural area of Ecuador, that  
95 was found to excrete *Leptospira* in its semen. The boar had been vaccinated and showed  
96 no clinical signs of disease, but laboratory analysis identified a pathogenic *Leptospira*  
97 species that had not been previously described in the reproductive tract of pigs. We  
98 present serologic, molecular, and histopathologic data from this rare case of porcine  
99 genital carriage of pathogenic *Leptospira*. Our results reaffirm the need for a thorough  
100 understanding of the epidemiology of leptospirosis in endemic regions at the local level  
101 in order to implement appropriate preventive vaccination and improve disease control  
102 programs [12].

## 103 **Materials and methods**

## 104 **Boar information**

105 The subject under study was a 2-year-old Landrace/Yorkshire crossbreed boar in its  
106 reproductive stage, maintained in a rural pig-breeding farm located in the suburbs of  
107 Quito. Within the farm, animals are kept in individual pens, have routine veterinary visits,  
108 a balanced diet, free access to feed and water, and occasional plague management and  
109 cleaning. Animals on the farm are vaccinated every six months, receiving an anti-  
110 leptospiral vaccine against *Leptospira interrogans* serovars Bratislava, Canicola,  
111 Grippotyphosa, Hardjo, Icterohaemorrhagie, and Pomona (Farrow sure®, Zoetis). The  
112 last leptospirosis vaccination for the boar occurred 1 month prior to the collection of the  
113 first diagnostic blood sample (June 2019).

114 The boar's semen was collected weekly and provided to external producers, and used for  
115 artificial insemination within the farm. In February 2019, two sows inseminated with  
116 semen from this boar had reproductive problems (reabsorption and repetition of estrus).  
117 Later, a second insemination of the same sows resulted in mummification during  
118 farrowing. In addition, external pork producers who bought the semen, also reported fetus  
119 mummifications. These reports, coupled with blood observed in the semen, came to the  
120 attention of the farm veterinarian who collected diagnostic specimens to test for  
121 leptospirosis. Two additional indicators for leptospirosis and possible circulation of  
122 pathogenic *Leptospira* were observed by the farm veterinarian: 1. rat droppings were  
123 frequently found inside and outside the pens, and 2. one year earlier (2018) a different  
124 farrowed sow showed blood in her urine. This sow was impregnated with a different boar.  
125 The serum sample from this animal showed high Microscopic Agglutination Test (MAT)  
126 antibodies titers, however the offspring were negative for the MAT. We were unable to  
127 access the samples or results from this sow.

## 128 **Sample collection**

129 Blood samples were collected from the jugular vein of the boar on two different dates  
130 (Sample S1 on July 2019, and Sample S2 on August 2019), and sent to the National  
131 Reference Laboratory for Animal Diagnostics (AGROCALIDAD) to be tested with a  
132 Microscopic Agglutination Test (MAT). Considering that *Leptospira* in urine can be  
133 intermittently excreted [13], four urine samples were collected by spontaneous  
134 micturition on different dates: September 9<sup>th</sup> and 26<sup>th</sup>, October 1<sup>st</sup> 2019, and February  
135 20<sup>th</sup> 2020. Three semen samples were collected on September 20<sup>th</sup>, 26<sup>th</sup> and October 1<sup>st</sup>  
136 2019. Each semen sample was divided into spermatic (semen) and post-spermatic (dense  
137 discharge from the Cowper glands and prostate) fractions and placed into sterile tubes.

138 On February 20<sup>th</sup> 2020, the farm owners culled the boar, allowing us to collect  
139 tissue samples. Kidney, testicle, and epididymis samples were placed in sterile tubes with  
140 80% ethanol for molecular detection of *Leptospira*, and in 10% buffered formalin for  
141 histopathological examination. Samples were transported on ice to the microbiology  
142 laboratory of the Universidad San Francisco de Quito and kept at -20°C before analyses.

## 143 ***Leptospira* detection**

144 DNA from tissue and fluids was extracted using the DNeasy Blood and Tissue kit -  
145 Qiagen, CA, USA for semen and urine, and Purelink Genomic DNA kit - Invitrogen,  
146 Carlsbad, CA, USA for kidney and testicle tissue. Different kits were used because of  
147 inconsistent availability in Ecuador. Detection of the *lipL32* gene was used to define  
148 *Leptospira* DNA positivity [14]. Positive samples were subjected to a second round of  
149 PCR using MLST primers [15]. MLST amplicons were sequenced using a portable  
150 Oxford Nanopore MinION sequencer. Library preparation was performed using the  
151 Barcoding kit (SQK-RBK004 - Oxford Nanopore Technologies), and loaded into a  
152 MinION Flowcell (FLO-MIN 106). Guppy (version 3.4.5) was used for basecalling of

153 FAST5 files. Porechop (version 0.2.4) (<https://github.com/rrwick/Porechop>) was used to  
154 perform demultiplexing and adapter removal, and Nanoplot was used to determine  
155 sequence quality (<http://nanoplot.bioinf.be/>). *Leptospira* amplicons were filtered using  
156 the BLAST command line tool [16], aligned using minimap2 [17], and visualized using  
157 Tablet [18]. Consensus sequences were obtained using online EMBL-EBI search and  
158 sequence analysis tools ([https://www.ebi.ac.uk/Tools/msa/emboss\\_cons/](https://www.ebi.ac.uk/Tools/msa/emboss_cons/)), and  
159 identification of *Leptospira* species was confirmed using the online BLAST tool  
160 (<https://blast.ncbi.nlm.nih.gov/Blast.cgi>).

## 161 **Histopathological analysis**

162 Samples submitted for histopathological analysis were embedded in paraffin [19]. Blocks  
163 were cut to 4  $\mu\text{m}$ , stained with hematoxylin-eosin, and observed under light microscopy  
164 [19].

## 165 **Ethics statement**

166 Verbal consent from the owner was provided throughout the entire study. Samples were  
167 collected under the permit issued by the Animal Bioethics Committee at Universidad San  
168 Francisco de Quito (Official Letter 2019-004-a), and molecular detection of *Leptospira*  
169 was performed under the permit: Contrato Marco de Acceso a los Recursos Genéticos  
170 (MAE-DNB- CM-2018-0106).

## 171 **Results**

172 MAT on serum samples gave positive results with titers of 1:100 for serovar Canicola in  
173 sample S1, and 1:100 for serovars Pomona and Hardjo in sample S2 (Table S1).

174  
175 *Leptospira* DNA was detected in semen (spermatic and post-spermatic fraction),  
176 and kidney and testicle tissues (Table 1). We were able to sequence four MLST genes

177 (*icdA*, *lipL41*, *secY*, and *16S rDNA*) from a semen sample. These sequences were  
 178 indicative of *Leptospira santarosai* with 99% identity (Data available at  
 179 <https://www.ncbi.nlm.nih.gov> Bioproject ID: PRJNA741491, Biosample ID:  
 180 SAMN1989635).

181 **Table 1. Positivity of pathogenic *Leptospira* (amplification of *lipL32* gene) in urine,**  
 182 **semen, and tissue samples.**

| <i>lipL32</i> qPCR Results |          |                        |                         |                        |            |                        |
|----------------------------|----------|------------------------|-------------------------|------------------------|------------|------------------------|
| Date                       | Urine    | Spermatic Fraction     | Post spermatic fraction | Kidney                 | Epididymis | Testicles              |
| 20/09/2019                 | Negative | Negative               | Positive<br>(Ct=32,15)  | —                      | —          | —                      |
| 26/09/2019                 | Negative | Positive<br>(Ct=15,95) | Positive<br>(Ct=21,21)  | —                      | —          | —                      |
| 01/10/2019                 | Negative | Negative               | Positive<br>(Ct=32,57)  | —                      | —          | —                      |
| 20/02/2020                 | Negative | —                      | —                       | Positive<br>(Ct=32,38) | Negative   | Positive<br>(Ct=26,87) |
| <b>% Positivity</b>        | <b>0</b> | <b>33</b>              | <b>100</b>              | <b>100</b>             | <b>0</b>   | <b>100</b>             |

183

184 Interestingly, histopathology from kidney, testicle, and epididymis stained with  
 185 hematoxylin-eosin, showed intact tissue with no microscopic lesions (Fig 1). Also, no  
 186 gross lesions were observed in the organs during necropsy.

187

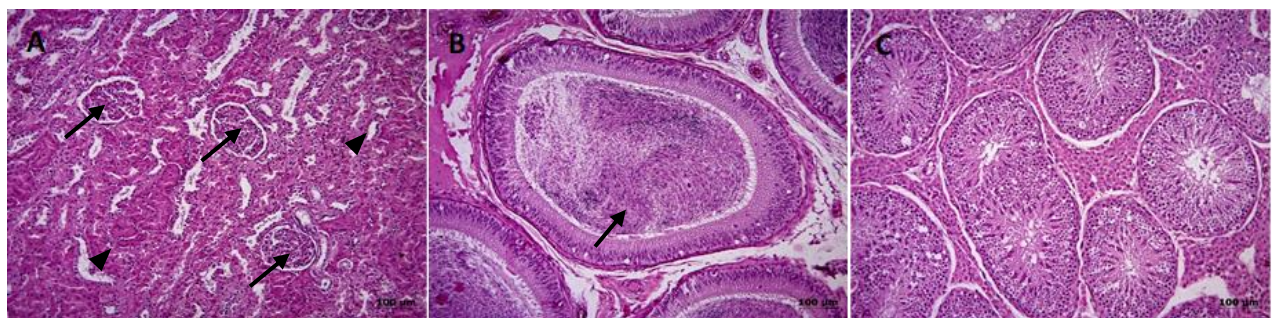

188



189 **Fig 1. Histopathology of the boar organs.** (A) Histology of the kidney presenting normal  
190 glomeruli (arrows) and tubules (arrowheads), showing no sign of inflammation. (B) Normal  
191 histology of the epididymis, exhibiting abundant spermatozoa in the lumen (arrow). (C) Normal  
192 histology of the testicle, physiological development of cell populations and normal architecture  
193 are maintained. No signs of inflammation are evident.

## 194 **Discussion**

195 Genital leptospirosis can go unnoticed, compromising the reproductive productivity of  
196 herds over long periods of time [20]. However, the severity of the disease varies  
197 depending on the infecting strain and the affected species [2]. This research is the first  
198 record of *L. santarosai* in the reproductive system of a boar; specifically in testes and  
199 semen. We were also able to detect the bacteria in kidney tissue, but not in urine, probably  
200 because the animal was not excreting detectable amounts of leptospire at the time of  
201 urine collection and the focus of infection seems to have been in the reproductive tract.  
202 *Leptospira santarosai* have been reported in pig urine samples from Ecuador [7]. Our  
203 current findings are of particular interest because they indicate that reproductive and  
204 urinary aspects of the urogenital track of boars can both be colonized with *L. santarosai*,  
205 and present two routes of shedding and transmission.

206 Our research was carried out after observing that some sows, inseminated with  
207 semen from the same donor, had reproductive failures. The donor boar did not show  
208 clinical signs of leptospirosis, and the histopathological samples did not show evidence  
209 of tissue damage in the testes or epididymis. However, PCR and sequencing identified *L.*  
210 *santarosai* in testicles and semen samples. As previously reported for bulls [21], rams  
211 [22] or stallions [23] without apparent clinical signs, the presence of pathogenic  
212 *Leptospira* species DNA in semen suggests the potential venereal transmission of this  
213 pathogen. *Leptospira interrogans* and *L. kirschneri* have also been isolated from the

214 reproductive tract of boars in Italy [24]. In the present case, the history of failed  
215 pregnancies provide evidence that leptospires were transmitted from the boar to sows via  
216 semen during artificial insemination (AI). In fact, *L. santarosai* has previously been  
217 associated with AI-transmitted bovine genital leptospirosis in other Latin American  
218 countries [20]. AI is a useful tool to introduce superior genes into herds and reduces the  
219 risk of injury and disease transmission through natural mating. However, semen can be  
220 contaminated with pathogens like *Leptospira* spp. [25]. The best strategy to prevent  
221 diseases transmitted by AI is to use pathogen-free boars, regularly monitoring animals  
222 and semen, and maintaining biosecurity strategies such as rodent control [26]. Indeed, the  
223 risk of *Leptospira* occurrence in the semen of boars from large commercial farms is low  
224 [27]. However, as sanitary conditions can affect AI, this method is a risk factor associated  
225 with leptospirosis on pig farms [28,29]. To our knowledge, prior to our study, the boar  
226 never tested positive for leptospirosis, however the presence of rodents in and around the  
227 farm put the animal at risk of infection.

228         Vaccination is one of the main strategies used to limit the spread of leptospires in  
229 herds. Currently, polyvalent vaccines include the most frequent serovars. However,  
230 vaccines are less effective in sites where local serovars are not non-included in the vaccine  
231 [30]. This is consistent with the fact that the boar under study was infected despite being  
232 vaccinated. Specifically, the vaccine used on this boar includes six serovars (Bratislava,  
233 Canicola, Grippotyphosa, Hardjo, Icterohaemorrhagiae and Pomona), while 15 different  
234 serovars have been identified in *L. santarosai* (Alice, Atlantae, Babudieri, Bananal,  
235 Batavidae, Beye, Canalzonae, Georgia, Guaricura, Kremastos, Peru, Pyrogenes,  
236 Shermani, Szwajizak and Tabaquite) but were not contained in the vaccine used on the  
237 farm [31–33].

238 Identification and removal of infected animals is used to control many infectious  
239 diseases, but is of limited value when the subclinical form is the most common  
240 presentation, and tests do not reliably identify carrier animals [2]. The MAT is the most  
241 common serological screening method used for leptospirosis. It is performed by  
242 incubating patient serum with various serovars of leptospire with any reacting serovar  
243 being indicative of the infecting serovar. Confirmation of an active infection is made by  
244 testing a second sample and demonstrating an increase in antibody titer. The MAT has  
245 the advantage of being serovar specific, but is prone to false negative results if the panel  
246 does not contain representative antigens of local serovars [6]. Furthermore, the MAT  
247 results must be interpreted with caution as it cannot discriminate between antibodies  
248 resulting from infection or vaccination, and high titers are not necessarily indicative of  
249 infection [34]. In our case, the boar MAT results show titers of 1:100 against three  
250 different serovars (Canicola, Pomona, and Hardjo), but this is undoubtedly due to  
251 vaccine-based immunity [6]. It is impossible to know if the animal would have shown  
252 any response to a serovar of *L. santarosai* because the reference diagnostic laboratory,  
253 where the MAT was performed, does not use *L. santarosai* serovars or any characterized  
254 local isolates. Molecular methods are also important tools for diagnosis in animals that  
255 do not show serological responses [35]. As previously reported for other domestic species  
256 [21–23], our results show that PCR and sequencing are important tools for the detection  
257 and characterization of leptospire in semen at swine artificial insemination centers.  
258 However, PCR and amplicon sequencing typically provides only species level  
259 identification and does not allow for serovar identification, limiting translational utility.  
260 This information is crucial for a better understanding of the epidemiology, the utility of  
261 diagnostic tests, and the development of new vaccines [36]. Based on these findings, we  
262 consider that the combined use of MAT as a screening test, followed by PCR and

263 amplicon sequencing for the direct detection of, and characterization of *Leptospira* spp.  
264 was adequate for the identification of carrier animals, but bacteriological isolation of local  
265 serovars is critical for increasing the accuracy of MATs and improvement to vaccination  
266 strategies.

267       Leptospirosis is considered an underreported occupational disease, especially in  
268 developing countries [37]. Transmission among animals and humans through direct  
269 contact or indirectly through contaminated environments in low-tech peridomestic pig  
270 farms may be relatively common [38,39]. *Leptospira santarosai* have been previously  
271 identified in cases of human leptospirosis [33,40,41], and our findings reflect the potential  
272 risk of pigs on rural farms in low-income countries as a possible source of human and  
273 animal leptospirosis. Prevention and control measures for leptospirosis must be  
274 approached from a one-health perspective, however, a major limiting factor has been the  
275 lack of communication and cooperation between the human and animal healthcare  
276 communities [42]. This is the case of Ecuador, where leptospirosis is a notifiable human  
277 disease, but not a notifiable animal disease. In fact, the Ministry of Public Health reported  
278 643 cases of human leptospirosis between 2016 and 2021, but there are no official reports  
279 of leptospirosis in cattle [43]. This information gap contributes to the lack of knowledge  
280 of the epidemiology of leptospirosis in the region.

## 281 **Conclusion**

282 This is the first report on the detection and identification of a pathogenic *Leptospira* from  
283 the reproductive system of a boar in Ecuador. The finding of *L. santarosai* in testicles and  
284 semen, coupled with evidence of failed pregnancies in recipient sows is significant  
285 because it provides additional evidence of venereal transmission of leptospirosis in the  
286 swine industry. Furthermore, the silent and chronic spread of *L. santarosai* or any other  
287 species represents additional risks to public health, which needs to be approached from

288 a one-health perspective by effective communication between animal and human health  
289 surveillance sectors.

## 290 **Supporting information**

### 291 **S1 Table. Microscopic Agglutination Test of infected**

| Date       | Sample | Serovar             |          |          |          |               |          |
|------------|--------|---------------------|----------|----------|----------|---------------|----------|
|            |        | Icterohaemorrhagiae | Pomona   | Canicola | Hardjo   | Grippityphosa | Wolffi   |
| 31/07/2019 | S1     | Negative            | Negative | 1:100    | Negative | Negative      | Negative |
| 19/08/2019 | S2     | Negative            | 1:100    | Negative | 1:100    | Negative      | Negative |

292

293

## 294 **Acknowledgments**

295 This work was funded by the Collaboration Grants HUBI 16874 to Veronica Barragan  
296 from the Universidad San Francisco de Quito. Salary support for T. Pearson was  
297 provided by NIH/NIMHD (U54MD012388) and NIH/NIAID (R15AI156771). We are  
298 grateful to Belen Prado-Vivar (Centro de Bioinformatica, Universidad San Francisco de  
299 Quito USFQ) for her technical assistance during sequencing.

300

## 301 **References**

- 302 1. Mwachui MA, Crump L, Hartskeerl R, Zinsstag J, Hattendorf J. Environmental  
303 and Behavioural Determinants of Leptospirosis Transmission: A Systematic  
304 Review. *PLoS Negl Trop Dis*. 2015;9. doi:10.1371/JOURNAL.PNTD.0003843
- 305 2. Ellis WA. Animal Leptospirosis. *Curr Top Microbiol Immunol*. 2015;387: 99–137.  
306 doi:10.1007/978-3-662-45059-8\_6
- 307 3. Ramos ACF, Souza GN, Lilenbaum W. Influence of leptospirosis on reproductive  
308 performance of sows in Brazil. *Theriogenology*. 2006;66: 1021–1025.  
309 doi:10.1016/j.theriogenology.2005.08.028

- 310 4. Ospina-Pinto MC, Rincón-Pardo M, Soler-Tovar D, Hernández-Rodríguez P.  
311 Alteration of the reproductive indicators by the presence of *Leptospira* spp. in sows  
312 of swine farms. *Acta Sci Vet.* 2019;47: 1–8. doi:10.22456/1679-9216.89894
- 313 5. Ellis WA. Leptospirosis. In: Zimmermann JJ, Karriker LA, Ramirez A, Schwartz  
314 KJ, Stevenson GW, editors. *Diseases of Swine*. John Wiley & Sons, Inc.; 2012.  
315 pp. 770–778.
- 316 6. Adler B, De la Peña Moctezuma A. *Leptospira* and leptospirosis. *Vet Microbiol.*  
317 2010;140: 287–296. doi:10.1016/J.VETMIC.2009.03.012
- 318 7. Barragan V, Chiriboga J, Miller E, Olivas S, Birdsell D, Hepp C, et al. High  
319 *Leptospira* Diversity in Animals and Humans Complicates the Search for Common  
320 Reservoirs of Human Disease in Rural Ecuador. *PLoS Negl Trop Dis.* 2016;10.  
321 doi:10.1371/journal.pntd.0004990
- 322 8. Chiriboga J, Barragan V, Arroyo G, Sosa A, Birdsell DN, España K, et al. High  
323 Prevalence of Intermediate *Leptospira* spp. DNA in Febrile Humans from Urban  
324 and Rural Ecuador. *Emerg Infect Dis.* 2015;21: 2141.  
325 doi:10.3201/EID2112.140659
- 326 9. Barragan V, Olivas S, Keim P, Pearson T. Critical knowledge gaps in our  
327 understanding of environmental cycling and transmission of *Leptospira* spp. *Appl*  
328 *Environ Microbiol.* 2017;83. doi:10.1128/AEM.01190-17/ASSET/88A36FEB-  
329 E3F2-4E19-939D-  
330 AB7C217DB22A/ASSETS/GRAPHIC/ZAM9991180770001.JPEG
- 331 10. Orlando SA, Perez A, Sanchez E, de la Cruz C, Rugel O, Garcia-Bereguian MA.  
332 High seroprevalence of anti- *Leptospira* spp. antibodies in domestic and wild  
333 mammals from a mixed use rescue center in Ecuador: Lessons for “One Health”  
334 based conservation strategies. *One Heal* (Amsterdam, Netherlands). 2020;10.

- 335           doi:10.1016/J.ONEHLT.2020.100140
- 336    11.   Gavilanes MPZ, Pérez LL, Santana MVG, Moreir TIV, Loor LEV, Mejía RRV, et  
337           al. Seroprevalence of antibodies against leptospira spp. In pigs raised in Portoviejo,  
338           Ecuador. *Rev Cubana Med Trop.* 2020;72: 1–14.
- 339    12.   Bertasio C, Papetti A, Scaltriti E, Tagliabue S, D’incau M, Boniotti MB.  
340           Serological Survey and Molecular Typing Reveal New Leptospira Serogroup  
341           Pomona Strains among Pigs of Northern Italy. *Pathog* (Basel, Switzerland).  
342           2020;9. doi:10.3390/PATHOGENS9050332
- 343    13.   Adler B. *Leptospira and Leptospirosis*. Adler B, editor. *Current Topics in*  
344           *Microbiology and Immunology*. Berlín: Springer; 2015. doi:10.1007/978-3-662-  
345           45059-8
- 346    14.   Stoddard RA, Gee JE, Wilkins PP, McCaustland K, Hoffmaster AR. Detection of  
347           pathogenic *Leptospira* spp. through TaqMan polymerase chain reaction targeting  
348           the LipL32 gene. *Diagn Microbiol Infect Dis.* 2009;64: 247–255.  
349           doi:10.1016/j.diagmicrobio.2009.03.014
- 350    15.   Ahmed N, Devi SM, Valverde M de los Á, Vijayachari P, Machang’u RS, Ellis  
351           WA, et al. Multilocus sequence typing method for identification and genotypic  
352           classification of pathogenic *Leptospira* species. *Ann Clin Microbiol Antimicrob.*  
353           2006;5: 28. doi:10.1186/1476-0711-5-28
- 354    16.   National Center for Biotechnology Information (US). BLAST® Command Line  
355           Applications User Manual. National Center for Biotechnology Information (US);  
356           2008.
- 357    17.   Li H. Minimap2: pairwise alignment for nucleotide sequences. *Bioinformatics.*  
358           2018;34: 3094. doi:10.1093/BIOINFORMATICS/BTY191
- 359    18.   Milne I, Bayer M, Stephen G, Cardle L, Marshall D. Tablet: Visualizing next-

- 360 generation sequence assemblies and mappings. *Methods Mol Biol.* 2016;1374:  
361 253–268. doi:10.1007/978-1-4939-3167-5\_14
- 362 19. Prophet EB, Armed Forces Institute of Pathology (U.S.). *Laboratory methods in*  
363 *histotechnology.* Washington D.C.: American Registry of Pathology; 1992.
- 364 20. Loureiro AP, Lilenbaum W. Genital bovine leptospirosis: A new look for an old  
365 disease. *Theriogenology.* 2020;141: 41–47.  
366 doi:10.1016/J.THERIOGENOLOGY.2019.09.011
- 367 21. Heinemann MB, Garcia JF, Nunes CM, Morais ZM, Gregori F, Cortez A, et al.  
368 Detection of leptospires in bovine semen by polymerase chain reaction. *Aust Vet*  
369 *J.* 1999;77: 32–34. doi:10.1111/J.1751-0813.1999.TB12422.X
- 370 22. Lilenbaum W, Vargas R, Brandão FZ, Cortez A, de Souza SO, Brandão PE, et al.  
371 Detection of *Leptospira* spp. in semen and vaginal fluids of goats and sheep by  
372 polymerase chain reaction. *Theriogenology.* 2008;69: 837–842.  
373 doi:10.1016/J.THERIOGENOLOGY.2007.10.027
- 374 23. Hamond C, Martins G, Medeiros MA, Lilenbaum W. Presence of Leptospiral  
375 DNA in Semen Suggests Venereal Transmission in Horses. *J Equine Vet Sci.*  
376 2013;33: 1157–1159. doi:10.1016/J.JEVS.2013.03.185
- 377 24. Cilia G, Bertelloni F, Piredda I, Ponti MN, Turchi B, Cantile C, et al. Presence of  
378 pathogenic *Leptospira* spp. in the reproductive system and fetuses of wild boars  
379 (*Sus scrofa*) in Italy. *PLoS Negl Trop Dis.* 2020;14: 1–12.  
380 doi:10.1371/JOURNAL.PNTD.0008982
- 381 25. Althouse GC, Rossow K. The potential risk of infectious disease dissemination via  
382 artificial insemination in swine. *Reprod Domest Anim.* 2011;46 Suppl 2: 64–67.  
383 doi:10.1111/J.1439-0531.2011.01863.X
- 384 26. Maes D, Nauwynck H, Rijsselaere T, Mateusen B, Vyt P, de Kruif A, et al.



- 385 Diseases in swine transmitted by artificial insemination: an overview.  
386 Theriogenology. 2008;70: 1337–1345.  
387 doi:10.1016/J.THERIOGENOLOGY.2008.06.018
- 388 27. Scheinflug K, Schiller S, Jäkel H, Schulze M, Waberski D, Mühldorfer K.  
389 Relevance of *Leptospira* in boar and for the development of alternative  
390 antimicrobial concepts in boar semen preservation. *Porc Heal Manag.* 2020;6.  
391 doi:10.1186/S40813-020-00169-9
- 392 28. Boqvist S, Chau BL, Gunnarsson A, Olsson Engvall E, Vågsholm I, Magnusson  
393 U. Animal- and herd-level risk factors for leptospiral seropositivity among sows in  
394 the Mekong delta, Vietnam. *Prev Vet Med.* 2002;53: 233–245.  
395 doi:10.1016/S0167-5877(01)00263-X
- 396 29. Valença RMB, Mota RA, Castro V, Anderlini GA, Pinheiro Júnior JW,  
397 Brandespim DF, et al. Prevalence and Risk Factors Associated with *Leptospira*  
398 spp. Infection in Technified Swine Farms in the State of Alagoas, Brazil Risk  
399 Factors Associated with *Leptospira* spp. in Swine Farms. *Transbound Emerg Dis.*  
400 2013;60: 79–86. doi:10.1111/j.1865-1682.2012.01320.x
- 401 30. Sonada RB, Azevedo SS de, Soto FRM, Costa DF da, Morais ZM de, Souza GO  
402 de, et al. Efficacy of leptospiral commercial vaccines on the protection against an  
403 autochthonous strain recovered in Brazil. *Braz J Microbiol.* 2018;49: 347–350.  
404 doi:10.1016/J.BJM.2017.06.008
- 405 31. Levett PN. Leptospirosis. *Clin Microbiol Rev.* 2001;14: 296–326.  
406 doi:10.1128/CMR.14.2.296
- 407 32. Hamond C, Pinna M, Medeiros MA, Bourhy P, Lilenbaum W, Picardeau M. A  
408 multilocus variable number tandem repeat analysis assay provides high  
409 discrimination for genotyping *Leptospira santarosai* strains. *J Med Microbiol.*

- 410 2015;64: 507. doi:10.1099/JMM.0.000045
- 411 33. Peláez Sanchez RG, Lopez JÁ, Pereira MM, Naranjo MA, Agudelo-F Lórez P.  
412 Genetic diversity of *Leptospira* in northwestern Colombia: first report of  
413 *Leptospira santarosai* as a recognised leptospirosis agent. Mem Inst Oswaldo Cruz.  
414 2016;111: 737–744. doi:10.1590/0074-02760160245
- 415 34. Schommer SK, Harrison N, Linville M, Samuel MS, Hammond SL, Wells KD, et  
416 al. Serologic titers to *Leptospira* in vaccinated pigs and interpretation for  
417 surveillance. PLoS One. 2021;16. doi:10.1371/JOURNAL.PONE.0260052
- 418 35. Di Azevedo MIN, Lilenbaum W. An overview on the molecular diagnosis of  
419 animal leptospirosis. Lett Appl Microbiol. 2021;72: 496–508.  
420 doi:10.1111/LAM.13442
- 421 36. Picardeau M. Diagnosis and epidemiology of leptospirosis. Med Mal Infect.  
422 2013;43: 1–9. doi:10.1016/J.MEDMAL.2012.11.005
- 423 37. Ghasemian A, Abbas AF, Al-Saadi AGM, Salari M, Memariani H, Shokouhi  
424 Mostafavi SK. Occupational leptospirosis as an underreported disease in high-risk  
425 groups: Implications for prevention and control measures. Rev Med Microbiol.  
426 2020;31: 75–78. doi:10.1097/MRM.0000000000000198
- 427 38. Calderón A, Rodríguez V, Máttar S, Arrieta G. Leptospirosis in pigs, dogs, rodents,  
428 humans, and water in an area of the Colombian tropics. Trop Anim Health Prod.  
429 2014;46: 427–432. doi:10.1007/s11250-013-0508-y
- 430 39. Ospina-Pinto MC, Hernández-Rodríguez P. Identification of *Leptospira* spp. in the  
431 animal-environment interface (swine-water) in pig production cycle. Trop Anim  
432 Health Prod. 2021;53. doi:10.1007/S11250-021-02567-9
- 433 40. Valverde M de los A, Goris MGA, González V, Anchia ME, Díaz P, Ahmed A, et  
434 al. New serovars of *Leptospira* isolated from patients in Costa Rica: implications

435 for public health. *J Med Microbiol.* 2013;62: 1263–1271.

436 doi:10.1099/JMM.0.058545-0

437 41. Kallel H, Bourhy P, Mayence C, Houcke S, Hommel D, Picardeau M, et al. First  
438 report of human *Leptospira santarosai* infection in French Guiana. *J Infect Public*  
439 *Health.* 2020;13: 1181–1183. doi:10.1016/J.JIPH.2020.03.020

440 42. Smythe LD, Chappel RJ. Leptospirosis – importance of a One Health approach.  
441 *Microbiol Aust* •. 2012; 154–156.

442 43. Ministerio de Salud Pública. Dirección Nacional de Vigilancia Epidemiológica,  
443 *Gaceta Epidemiológica.* In: Ministerio de Salud Pública [Internet]. 2022 [cited 10  
444 Jan 2022]. Available: [https://www.salud.gob.ec/direccion-nacional-de-vigilancia-](https://www.salud.gob.ec/direccion-nacional-de-vigilancia-epidemiologica-gaceta-epidemiologica/)  
445 [epidemiologica-gaceta-epidemiologica/](https://www.salud.gob.ec/direccion-nacional-de-vigilancia-epidemiologica-gaceta-epidemiologica/)

446

447

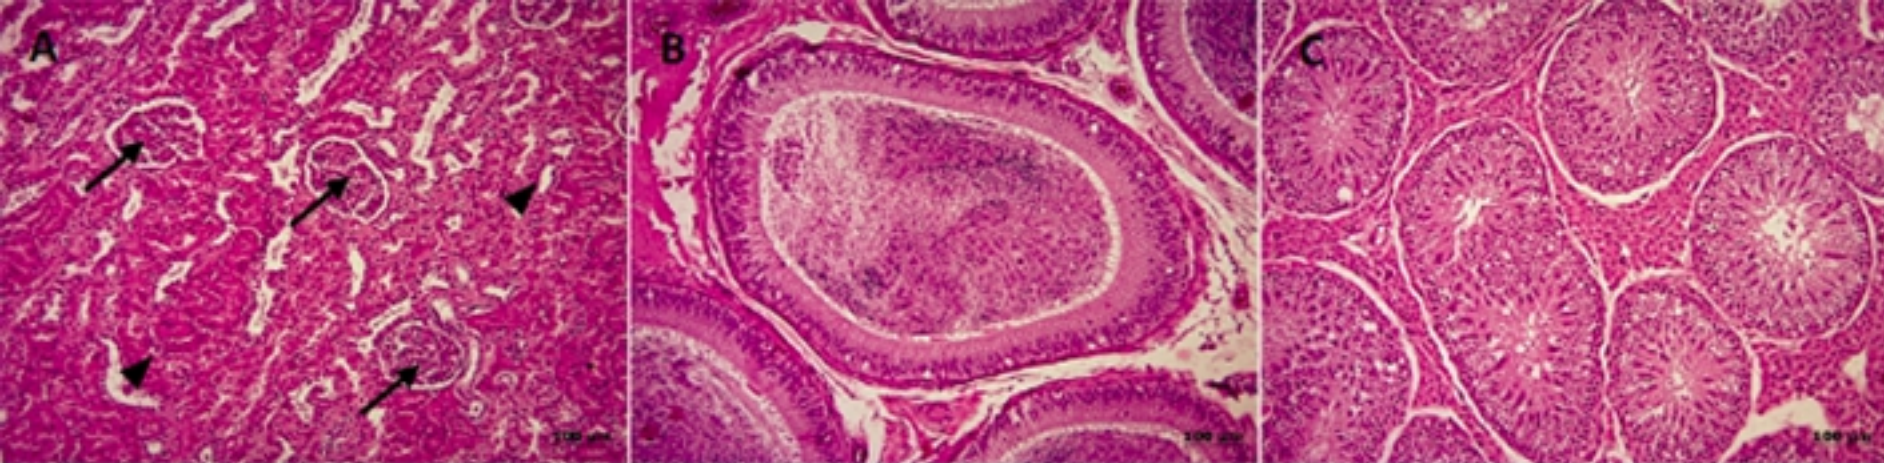

Figure
